# Supplementary material for: From a 3D hollow hexahedron to 2D hierarchical nanosheets: controllable synthesis of biochemistry-enabled Na7V3(P2O7)4/C composites for high-potential and long-life sodium ion batteries
Source: Royal Society of Chemistry journal article supplement (doi:10.1039/c6nr07012d), 2016-01-01

## Supporting information

Figure s1 Carbon contents of prepared bio-composites with different architectures.

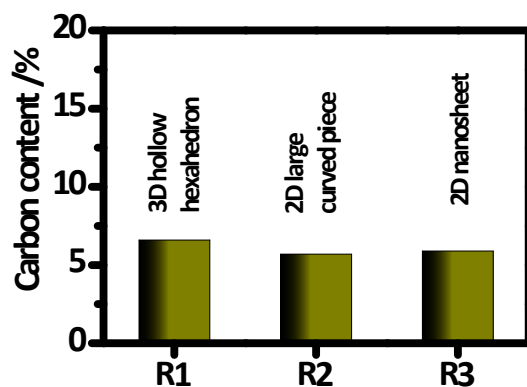

Figure s2 XRD patterns of (a) 3D hollow hexahedron (R1) and (b) 2D large curved piece (R2) samples before and after cycles.

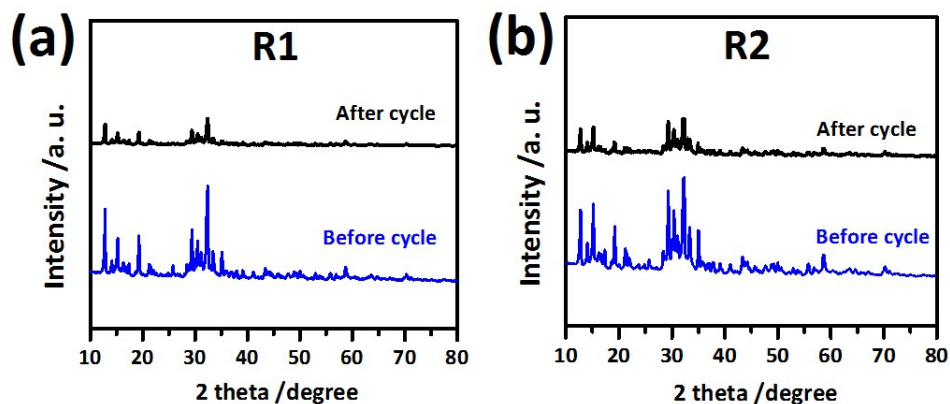

Supplement: c6nr07012d1.pdf [file c6nr07012d1.pdf]
